# Supplementary material for: Fabrication of copper sulfide using a Cu-based metal organic framework for the colorimetric determination and the efficient removal of Hg2+ in aqueous solutions
Source: Royal Society of Chemistry journal article supplement (doi:10.1039/c5nj01348h), 2015-01-01
Supplement: c5nj01348h1.pdf [file c5nj01348h1.pdf]

## Supplementary Data

### **Fabrication of copper sulfide using a Cu-based metal organic framework for colorimetric determination and efficient removal of Hg<sup>2+</sup> in aqueous solutions**

Yuhao Xiong, Linjing Su, Haiguan Yang, Peng Zhang, Fanggui Ye\*

Key Laboratory for the Chemistry and Molecular Engineering of Medicinal Resources  
(Ministry of Education of China), College of Chemistry and Pharmaceutical Science  
of Guangxi Normal University, Guilin 541004, China.

Table S1. Michaelis-Menten constant ( $K_m$ ) and maximum reaction rate ( $V_{max}$ ) of the oxidation reaction catalyzed by the PCuS.

| Catalyst | Substance                     | $K_m$ /mM | $V_{max}/10^{-8} \text{ M s}^{-1}$ |
|----------|-------------------------------|-----------|------------------------------------|
| PCuS     | TMB                           | 0.029     | 29                                 |
|          | H <sub>2</sub> O <sub>2</sub> | 0.15      | 16                                 |

Table S2. Determination results of Hg<sup>2+</sup> in pond water sample.

| Target added ( $\mu\text{M}$ ) | Found ( $\mu\text{M}$ ) | Recovery (%) | RSD (%) |
|--------------------------------|-------------------------|--------------|---------|
| 5                              | 5.4                     | 108          | 5.4     |
| 15                             | 14.8                    | 93.6         | 2.8     |
| 30                             | 30.2                    | 100.7        | 4.2     |

Table S3. The comparison of the adsorption capacity of PCuS with other adsorbents.

| Adsorbents                                                                | Maximum adsorption capacity (mg g <sup>-1</sup> ) | Reference |
|---------------------------------------------------------------------------|---------------------------------------------------|-----------|
| Thiol-functionalization of HKUST-1                                        | 714.29                                            | [22]      |
| Porphyrin-functionalized Fe <sub>3</sub> O <sub>4</sub> @SiO <sub>2</sub> | <10                                               | [30]      |
| Mesoporous silica spheres                                                 | <100                                              | [31]      |
| SBA-15-Ag                                                                 | 0.06                                              | [32]      |
| ZnS                                                                       | 2000                                              | [33]      |
| PCuS                                                                      | 2105                                              | This work |

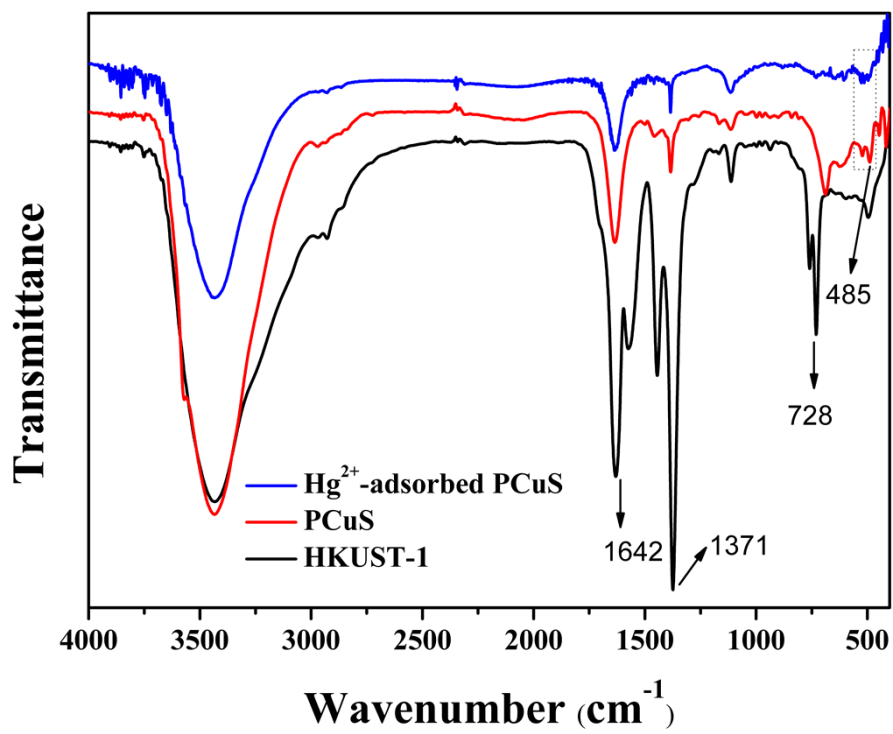

Fig. S1 FT-IR spectra of HKUST-1 and PCuS

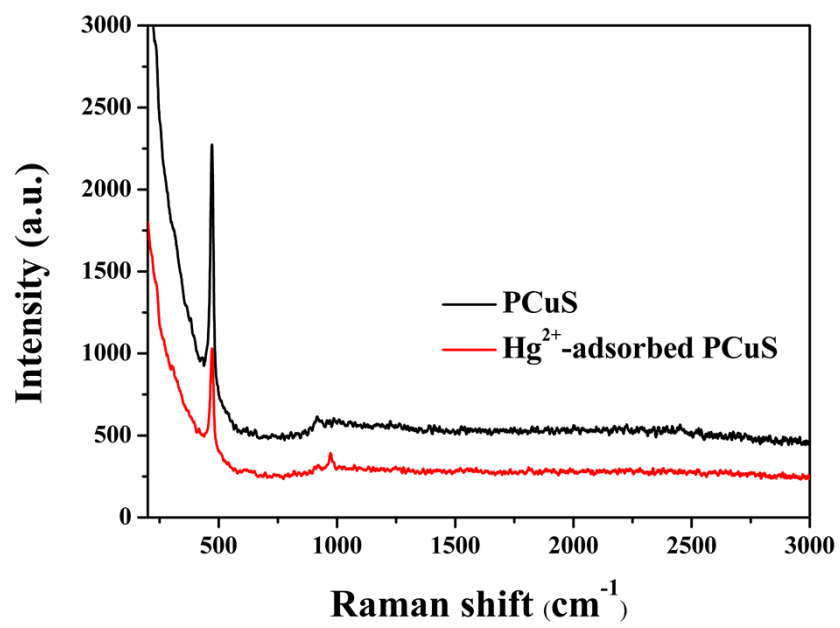

**Fig. S2** Raman spectra for PCuS before and after Hg<sup>2+</sup> sorption

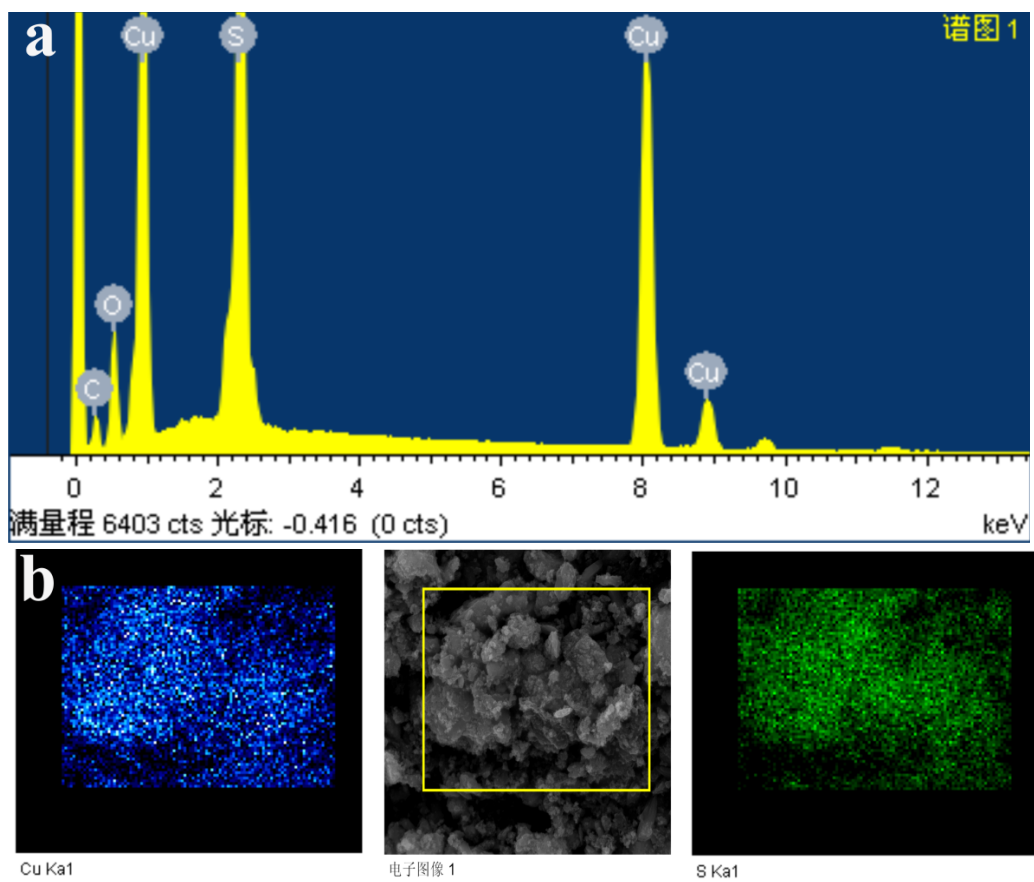

**Fig. S3** The EDS spectrum (a) and elemental mapping (b) of the PCuS.

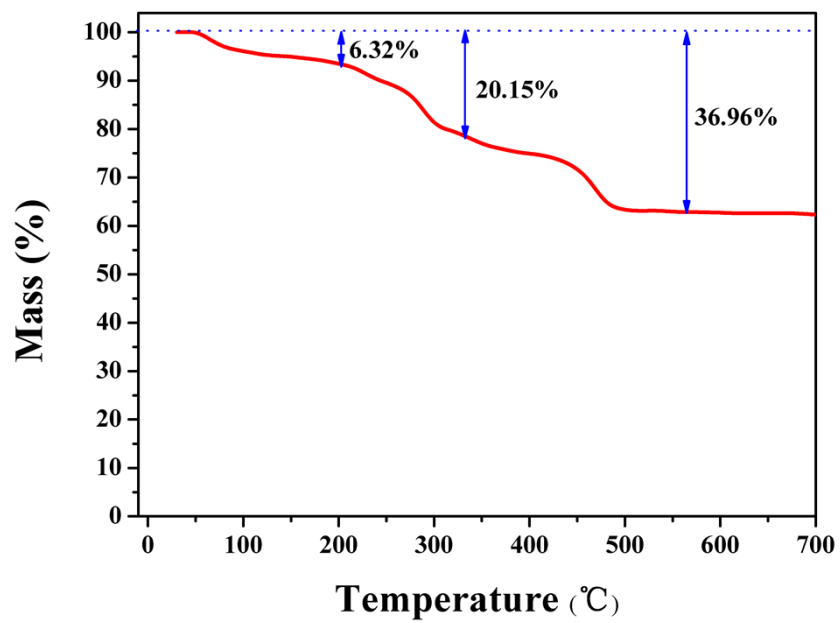

**Fig. S4** TGA curve of the PCuS



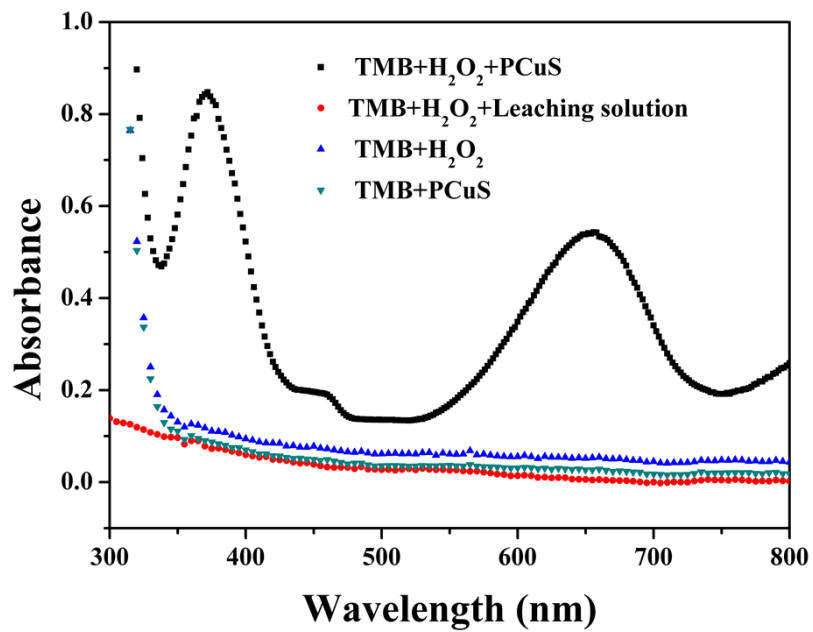

**Fig. S5** UV-Vis spectra of TMB buffer solution containing H<sub>2</sub>O<sub>2</sub>/PCuS, H<sub>2</sub>O<sub>2</sub>/leaching solution, H<sub>2</sub>O<sub>2</sub> and PCuS

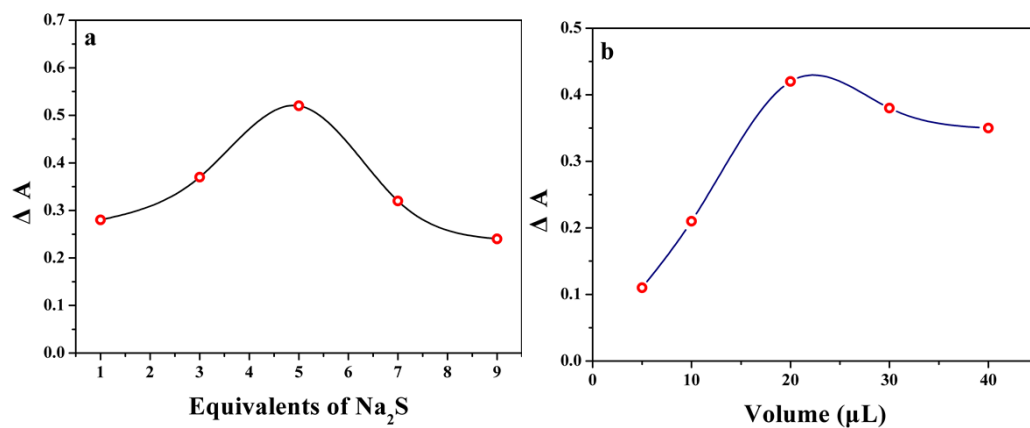

**Fig. S6** Effects of the amounts of Na<sub>2</sub>S used in the PCuS fabrication (a) and dosage of PCuS (b)

for Hg<sup>2+</sup> detection

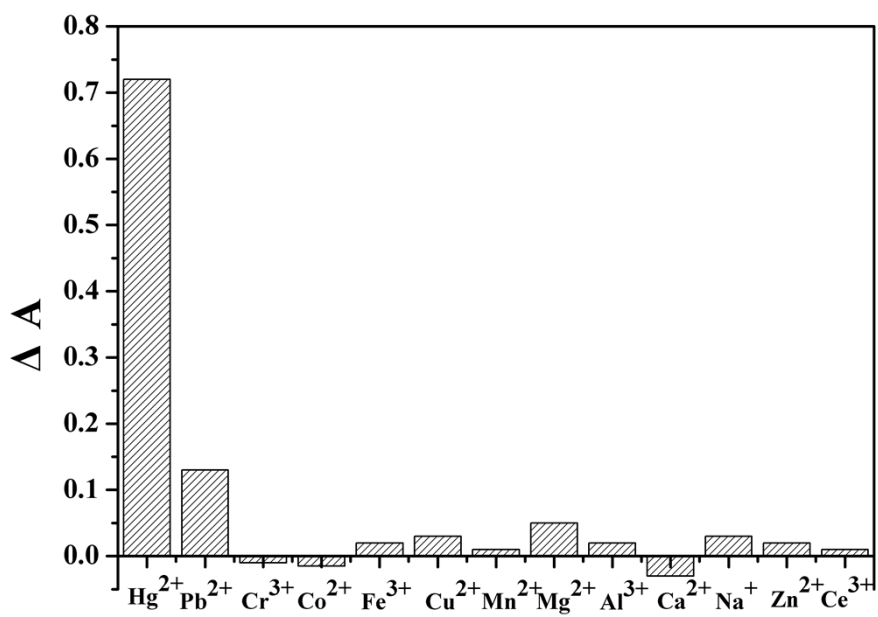

Fig. S7 Determination of the selectivity of Hg<sup>2+</sup> detection

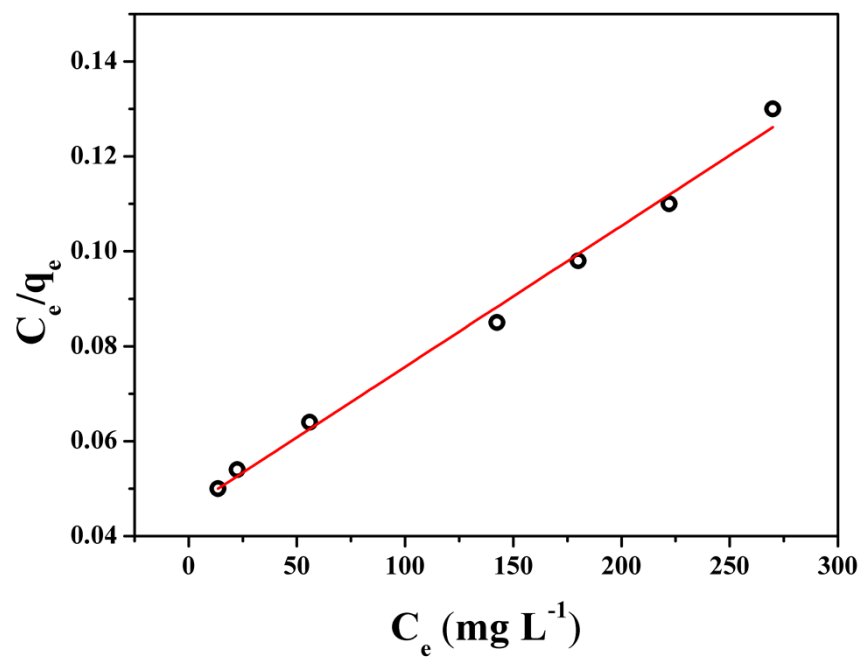

**Fig. S8** The fitted adsorption isotherms of Hg<sup>2+</sup> on PCuS by the Langmuir equation

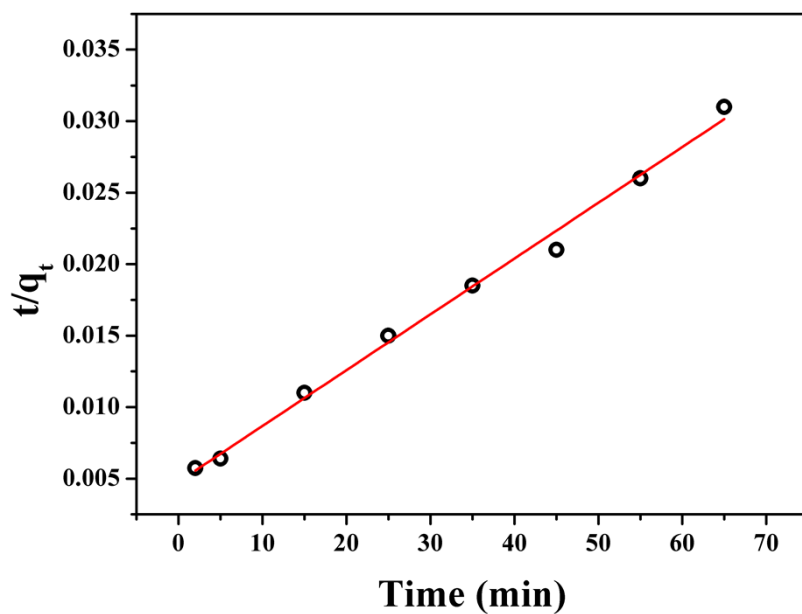

**Fig. S9** Plots of pseudo-second-order kinetics for the adsorption of  $\text{Hg}^{2+}$  on PCuS
